# Supplementary material for: Long-term consumption of artificial sweeteners does not affect cardiovascular health and survival in rats
Source: PeerJ. 2022 Mar 9;10:e13071. doi: 10.7717/peerj.13071 (PMC8917806; doi:10.7717/peerj.13071)
Supplement: Supplemental Information 1 [file peerj-10-13071-s001.xlsx]

## Sheet: Sheet1
	Before treatment		After treatment
Control group	BW (g)	Water (ml)	BW (2w)	water	BW (2m)	water	BW (4m)	water	BW (6m)	water	BW (9m)	water	BW (12m)	water
1	326	41.0261	397	45.02	433	54.1169	406	47.2236	423	58.6222	480	85	460	51.4583
2	366	46.06	376	47.28	406	50.7424	438	50.9456	450	62.364	Died
3	341	42.9138	360	45.27	383	47.8679	480	55.8308	506	70.1249	Died
4	345	44.4171	346	44.54	496	54.6232	401	44.1042	436	38.0274	505	55.7604	485	53.5521
5	406	52.2706	371	47.76	375	41.2978	431	47.4038	546	47.6214	455	50.2396	450	48
6	317	40.8123	454	58.45	392	43.1699	550	60.492	455	39.6845	Died
7	222	36.5467	210	34.57	253	47.6829	239	40.5964	246	46.6634	294	35.8033	308	37.5082
8	196	32.2665	242	39.84	260	49.0022	266	45.1826	271	51.4056	300	36.534	301	36.6557
9	235	38.6868	235	38.69	225	42.4058	278	47.2209	289	54.82	260	31.6628	260	31.6628
10	252	41.4362	282	46.37	290	47.68	267	40.6505	290	44.4851	279	39.9954	346	49.6
11	253	41.6007	262	43.08	265	43.57	285	43.391	280	42.9511	309	44.296	294	42.1457
12	240	39.4631	250	41.11	260	42.75	315	47.9585	305	46.786	277	39.7087	287	43
13	398	52.9163	416	43.0231	465	49.1763	510	46.3338	520	50.4696	522	50.6637	498	48.3344
14	379	50.3901	406	41.9889	465	49.1763	514	46.6972	544	52.799	542	52.6049	363	35.2317
15	370	49.1935	435	44.9881	460	48.6475	528	47.9691	533	51.7314	517	50.1785	480	46.5874
16	397	57.4466	439	53.2336	443	48.5659	483	48.6818	545	56.3914	558	57.7365	Died
17	371	53.6843	389	47.1706	480	52.6222	492	49.5889	520	53.8046	530	54.8393	506	50
18	355	51.3691	409	49.5958	427	46.8119	543	54.7292	491	50.804	495	51.2179	Died
19	201	38.1436	207	44.4479	237	38.7878	270	40.2571	282	46.7673	300	49.7525	282	46.7673
20	210	39.8515	230	49.3865	237	38.7878	254	37.8715	264	43.7822	279	46.2698	324	53.7327
21	195	37.005	215	46.1656	247	40.4244	254	37.8715	262	43.4505	271	44.9431	307	50.9134
Equal group	BW (g)	Water (ml)	BW (2w)	water	BW (2m)	water	BW (4m)	water	BW (6m)	water	BW (9m)	water	BW (12m)	water
1	222	36.039	245	79.1	262	70.2861	286	52.9375	303	64.7037	282	61.8958	294	64.5297
2	226	36.6883	246	79.42	268	71.8957	281	52.012	267	57.0162	292	63.7361	298	65.0458
3	245	39.7727	230	74.25	265	71.0909	265	49.0505	275	58.7245	290	63.3681	291	63.5866
4	212	33.5641	218	65.28	265	60.6158	252	50.0294	284	63.6266	276	58.2297	313	66.0359
5	228	36.0972	240	71.86	274	62.6745	284	56.3824	286	64.0747	303	51.9696	279	47.8532
6	239	37.8387	254	77.25	236	53.9824	280	55.5882	287	64.2987	309	62.8007	312	63.4104
7	230	28.2258	236	73.56	270	68.2843	275	57.3185	297	65.6254	243	59.9652	300	74.0311
8	250	30.6802	246	76.67	268	67.7785	287	59.8197	298	65.8464	301	59.5042	299	59.1088
9	233	28.594	250	77.92	260	65.7553	292	60.8618	286	63.1949	289	57.5306	307	61.1138
10	236	36.875	237	69.8	250	63.2262	255	47.2699	280	57.0182	286	56.1396	293	57.5136
11	221	34.5312	242	71.27	248	62.7204	276	51.1627	279	56.8145	303	58.8822	313	60.8255
12	231	36.0938	237	69.8	249	62.9733	262	48.5675	266	54.1673	285	55.9783	292	57.3532
13	240	50.7418	237	68.1	233	56.0695	263	59.4638	265	58.0056	285	56.1331	263	51.8
14	211	44.6105	243	69.82	261	62.8075	247	55.8463	260	56.9111	271	53.8669	299	59.4325
15	223	47.1476	220	63.22	254	61.123	264	59.6899	275	60.1944	Died
16	345	43.2081	356	71	415	61.0793	437	57.2144	458	74.3732	Died
17	340	42.5819	373	73.39	398	58.5773	451	59.0474	450	73.0741	Died
18	353	44.21	363	72.4	410	60.3434	441	57.7381	455	73.886	Died
19	335	44.036	397	72.16	438	65.1919	427	58.6766	448	74.2011	479	65	467	63.3716
20	357	46.9279	380	69.07	413	61.4709	451	61.9746	464	76.8512	Died
21	335	44.036	358	65.1	395	58.7918	461	63.3488	478	79.1699	Died
Splenda group	BW (g)	Water (ml)	BW (2w)	water	BW (2m)	water	BW (4m)	water	BW (6m)	water	BW (9m)	water	BW (12m)	water
1	223	37.9926	240	93.1727	260	69.6907	289	65.2245	281	68.7265	294	71.906	303	74.1072
2	224	38.1765	245	95.1138	250	67.0103	264	59.5822	271	66.2807	287	70.194	290	75.3855
3	233	39.8309	262	101.714	266	71.299	280	63.1933	278	67.9928	276	67.5036	299	73.1289
4	234	43.8694	248	80.0709	268	62.3135	260	65	286	69.4571	287	69.7	317	76.9857
5	208	38.6617	230	74.2593	247	57.4307	296	74	279	67.7571	296	71.8857	295	71.6429
6	232	43.4688	240	77.488	257	59.7558	260	65	275	66.7857	297	72.1286	310	75.2857
7	323	45.2266	354	64.2447	410	61.0119	430	56.9406	454	60.9851	366	49.1642	Died
8	315	44.1064	348	63.1558	377	56.1012	427	56.5434	444	59.6418	Died
9	344	48.167	380	68.9632	389	57.8869	457	60.516	442	59.3731	Died
10	370	53.6351	414	83.4627	430	66.6336	489	60.0932	462	55.5715	479	57.6164	448	53.8875
11	382	52.3747	390	78.6243	430	66.6336	512	62.9196	469	56.4135	464	55.8121	Died
12	369	53.4902	400	80.6403	450	69.7328	480	58.9872	474	57.0149	459	55.2107	Died
13	339	49.0954	373	70.8058	420	61.6545	446	55.1786	455	50.0053	503	54.2256	484	42.5551
14	354	51.2678	392	74.4125	393	57.691	460	56.9107	489	62.9947	466	50.9725	450	39.5657
15	360	52.1368	370	70.2363	420	61.6545	460	56.9107	Died
16	384	50.8493	370	50.7124	400	43.654	456	47.4585	519	66.0975	502	63.9324	Died
17	343	45.4201	400	54.8242	418	45.6184	458	47.6667	520	66.2248	506	64.4418	466	63
18	368	48.7306	404	55.3725	419	45.7276	460	47.8748	500	63.6777	518	65.9701	Died
