# Supplementary material for: Long-term consumption of artificial sweeteners does not affect cardiovascular health and survival in rats
Source: PeerJ. 2022 Mar 9;10:e13071. doi: 10.7717/peerj.13071 (PMC8917806; doi:10.7717/peerj.13071)
Supplement: Supplemental Information 2 [file peerj-10-13071-s002.xlsx]

## Sheet: data
	Heart Rate	Diameter;s	Diameter;d	Volume;s	Volume;d	Stroke Volume	Ejection Fraction	Fractional Shortening	Cardiac Output	LV Mass	LV Mass Cor	LVAW;s	LVAW;d	LVPW;s	LVPW;d		LA
Splenda	BPM	mm	mm	uL	uL	uL	%	%	mL/min	mg	mg	mm	mm	mm	mm
1L	298.476	3.03928	6.7868	36.1691	238.281	202.111	84.8208	55.2178	60.3254	408.218	326.574	2.11871	1.28701	1.98206	1.22329		3.157
1N	317.591	4.52313	8.21146	93.6909	365.86	272.169	74.3916	44.9169	86.4385	743.196	594.557	2.11991	1.30534	2.3234	1.28251		3.301
1R	253.85	3.18132	7.16435	40.766	270.59	229.824	84.9344	55.5952	58.3407	509.976	407.981	2.56495	1.23368	2.30747	1.18222		2.978
2L	242.635	4.05626	7.5987	72.5982	307.895	235.297	76.4211	46.6191	57.0912	610.321	488.257	2.27792	1.15276	2.65687	1.30934		3.462
2N	288.798	3.76714	6.85042	61.1428	243.57	182.428	74.8973	45.0087	52.6848	475.036	380.029	2.02524	1.33865	2.02524	1.33865		3.07405
2R	223.091	3.40326	6.92199	47.7392	249.167	201.428	80.8405	50.8341	44.9368	414.678	331.742	1.89036	1.09752	1.89036	1.09752		3.217
4N	248.11	5.88071	8.9704	171.991	444.497	272.506	61.3066	34.4432	67.6114	1477.91	1182.33	2.7352	1.96479	2.95274	2.02193		5.668
5L	243.492	5.01936	8.86332	119.395	433.244	313.85	72.4418	43.3693	76.4198	1290.31	1032.25	3.09771	1.95283	3.09564	1.91635		4.2863
5N	257.787	4.10348	7.08872	74.7414	263.18	188.438	71.6006	42.1125	48.577	913.703	730.962	2.83269	1.85737	2.98976	1.95064		4.21048
6L	230.654	4.42282	8.51135	88.8274	395.683	306.856	77.5509	48.0361	70.7775	1247.14	997.711	3.117	2.0086	3.32468	1.9466		4.91372
Mean	260.448	4.13967	7.69675	80.7061	321.197	240.491	75.9206	46.6153	62.3203	809.049	647.239	2.47797	1.51986	2.55482	1.52691		3.82676
SD	30.9231	0.872476	0.864026	41.1149	81.3045	48.3446	6.95457	6.31485	12.9575	400.402	320.321	0.4521	0.375103	0.517241	0.378635		0.909633
Equal
1L	269.203	3.81095	7.52959	62.6527	300.97	238.317	79.1831	49.387	64.1558	922.358	737.886	2.44099	1.42426	2.42428	1.46797		3.69607
1N	262.284	3.68908	6.97247	57.891	253.281	195.39	77.1436	47.0907	51.2476	693.756	555.005	2.60148	1.48518	2.71586	1.53504		2.90876
1R	260.126	3.5708	6.80816	53.5111	240.497	186.986	77.7498	47.5512	48.64	739.473	591.578	2.64932	1.46773	2.94142	1.78316		3.57902
2L	234.668	3.62217	7.40694	55.4474	290.259	234.811	80.8973	51.0976	55.1028	663.655	530.924	2.67568	1.31776	2.81334	1.3959		4.59229
2N	278.797	4.11104	7.0915	75.9404	263.18	187.24	71.1451	42.0287	52.2019	598.051	478.441	2.38944	1.34817	2.27021	1.30232		3.50691
2R	248.042	2.64507	6.13229	25.7348	189.652	163.917	86.4305	56.8665	40.6582	492.722	394.178	2.60588	1.48818	2.43714	1.25234		4.45963
3L	272.504	3.91261	6.92805	66.7264	249.765	183.039	73.2843	43.5252	49.8788	771.396	617.117	2.83511	1.65516	2.53834	1.62924		4.77755
3N	252.667	4.59048	7.49987	97.0335	298.655	201.622	67.5099	38.7926	50.9431	1042.27	833.816	2.67008	1.69238	2.67785	1.72562		3.48752
3R	224.9	2.62967	5.83039	25.722	169.073	143.351	84.7865	54.8972	32.2395	613.99	491.192	2.69639	1.76611	2.77838	1.6137		4.47029
4L	230.282	3.179	7.11828	40.8236	265.389	224.566	84.6174	55.3404	51.7134	798.759	639.007	2.66743	1.56676	2.78359	1.69759		3.83005
4N	275.586	3.04609	6.74268	36.624	234.945	198.321	84.4117	54.8238	54.6546	735.606	588.485	2.69811	1.63526	2.63784	1.63913		3.15567
4R	273.598	3.11471	6.60799	38.5001	224.303	185.803	82.8357	52.8644	50.8353	606.975	485.58	2.37084	1.33621	2.77236	1.58376		4.80742
5L	300.03	2.49082	6.07918	22.6382	186.077	163.439	87.834	59.0271	49.0366	599.575	479.66	2.83084	1.62126	2.87818	1.5597		4.519
5N	261.963	3.53142	6.91151	52.0701	248.483	196.413	79.0448	48.9052	51.4529	627.774	502.219	2.55838	1.46361	2.44411	1.37304		3.8397
7-1'	263.158	4.88706	8.45828	112.382	390.18	277.799	71.1975	42.2216	73.1049	1444.57	1155.66	2.87243	2.0752	3.08251	2.01723		4.98341
Mean	260.521	3.52206	6.94114	54.9131	253.647	198.734	79.2047	49.6279	51.7244	756.729	605.383	2.63749	1.55622	2.67969	1.57171		4.04089
SD	19.988	0.695244	0.656406	25.7531	54.5863	33.8283	6.19663	6.0907	9.08634	235.502	188.401	0.15169	0.197188	0.22159	0.198151		0.653824
8-1'	227.731	5.13432	9.00765	125.832	448.523	322.69	71.9452	43.0004	73.4866	1523.29	1218.63	2.8332	1.77797	2.80112	1.67576		4.58983
9-1'	306.135	3.62818	7.21899	55.5701	274.194	218.624	79.7333	49.7412	66.9282	711.523	569.218	2.32999	1.25126	2.47239	1.3999		4.15341
9-2'	274.098	3.08691	6.94843	37.6693	251.385	213.716	85.0153	55.5739	58.579	910.721	728.577	2.61278	1.75024	2.61937	1.72897		5.3105
10L	306.548	2.75553	6.03119	28.9539	182.887	153.933	84.1684	54.3121	47.1879	713.863	571.09	2.53713	1.74005	2.57384	1.87406		4.23408
10N	300.294	3.23502	6.13116	42.1053	189.169	147.064	77.742	47.2364	44.1625	562.263	449.81	2.47744	1.48979	2.24601	1.52259		3.21769
10R	282.885	3.29325	7.17842	44.0041	270.567	226.563	83.7364	54.1229	64.0915	710.949	568.759	2.73939	1.6344	2.77502	1.3352		4.06493
11L	293.772	3.39164	6.63452	47.379	226.481	179.102	79.0803	48.8789	52.615	744.827	595.861	2.77443	1.52463	2.96173	1.83874		3.69091
11N	271.337	3.81468	6.99807	62.7656	255.434	192.669	75.4279	45.4895	52.2781	810.318	648.255	2.78884	1.78006	2.66959	1.58285		3.49326
11R	283.438	3.58875	7.14743	54.3146	267.95	213.635	79.7296	49.7897	60.5525	856.704	685.363	2.72455	1.39448	2.80554	1.52147		4.21446
7L	262.743	2.86673	8.10676	31.9965	355.596	323.599	91.002	64.6378	85.0235	1419.02	1135.22	3.0897	1.79305	3.09656	1.84302		4.34812
7N	236.323	3.9464	7.992	67.7927	344.264	276.471	80.3079	50.6206	65.3364	1026.26	821.009	2.94625	1.75676	2.92554	1.56028		4.98055
7R	175.597	5.77144	8.5789	164.821	402.583	237.762	59.0591	32.7251	41.7503	1978.08	1582.46	3.09506	1.82833	2.68229	1.82748		4.72329
8N	239.063	5.30532	8.84617	136.23	432.172	295.942	68.4778	40.0269	70.7488	1545.77	1236.61	3.16951	1.7887	3.04621	1.89217		4.66108
9L	340.486	3.17147	6.29381	40.2201	200.907	160.687	79.9807	49.6097	54.7117	660.825	528.66	2.32023	1.47913	3.02978	1.79855		4.0586
9N	231.278	3.04914	6.82505	36.4745	241.43	204.955	84.8923	55.3244	47.4016	718.555	574.844	2.65082	1.51464	3.33378	1.66134		3.45435
9R	296.633	3.2437	6.93025	42.5833	250.477	207.893	82.9991	53.1951	61.6681	609.701	487.76	2.35587	1.21249	2.38853	1.45439		3.54719
Mean	270.523	3.70516	7.3043	63.6695	287.126	223.457	78.9561	49.6428	59.1576	968.917	775.133	2.71532	1.60725	2.77671	1.6573		4.17139
SD	40.4184	0.907977	0.935405	41.0426	84.2479	55.6649	7.55546	7.27647	11.7174	416.78	333.424	0.271321	0.201652	0.284999	0.180128		0.590888
P (S-C)	0.507485	0.240104	0.294971	0.31372	0.319584	0.433429	0.314897	0.289353	0.526166	0.343877	0.343877	0.105692	0.445696	0.169611	0.246167		0.251127
P (E-C)	0.394754	0.535444	0.223736	0.485916	0.202773	0.149192	0.921191	0.995145	0.059154	0.0944712	0.0944712	0.336915	0.482323	0.301054	0.217836		0.563912

## Sheet: Summary
	Heart Rate	LVDs	LVDd	Volume;s	Volume;d	Stroke Volume	Ejection Fraction	Fractional Shortening	Cardiac Output	LV Mass	LV Mass Cor	LVAW;s	LVAW;d	LVPW;s	LVPW;d		LA
	BPM	mm	mm	uL	uL	uL	%	%	mL/min	mg	mg	mm	mm	mm	mm
Mean	270.523	3.70516	7.3043	63.6695	287.126	223.457	78.9561	49.6428	59.1576	968.917	775.133	2.71532	1.60725	2.77671	1.6573		4.17139		Control
SD	40.4184	0.907977	0.935405	41.0426	84.2479	55.6649	7.55546	7.27647	11.7174	416.78	333.424	0.271321	0.201652	0.284999	0.180128		0.590888
Mean	260.521	3.52206	6.94114	54.9131	253.647	198.734	79.2047	49.6279	51.7244	756.729	605.383	2.63749	1.55622	2.67969	1.57171		4.04089		Equal
SD	19.988	0.695244	0.656406	25.7531	54.5863	33.8283	6.19663	6.0907	9.08634	235.502	188.401	0.15169	0.197188	0.22159	0.198151		0.653824
Mean	260.448	4.13967	7.69675	80.7061	321.197	240.491	75.9206	46.6153	62.3203	809.049	647.239	2.47797	1.51986	2.55482	1.52691		3.82676		Splenda
SD	30.9231	0.872476	0.864026	41.1149	81.3045	48.3446	6.95457	6.31485	12.9575	400.402	320.321	0.4521	0.375103	0.517241	0.378635		0.909633
																			Summary

## Sheet: Raw
Control	HR (bpm)	LVDs (mm)	LVDd(mm)	FS (%)	LVAWs (mm)	LVAWd (mm)	LVPWs (mm)	LVPWd (mm)	LA (mm)	PWV (m/s)
1	227.731	5.13432	9.00765	43.0004	2.8332	1.77797	2.80112	1.67576	4.58983	2.155
2	306.135	3.62818	7.21899	49.7412	2.32999	1.25126	2.47239	1.3999	4.05341	3.055
3	274.098	3.08691	6.94843	55.5739	2.61278	1.75024	2.61937	1.72897	5.3105	2.795
4	306.548	2.75553	6.03119	54.3121	2.53713	1.74005	2.57384	1.87406	4.23408	2.345
5	300.294	3.23502	6.13116	47.2364	2.47744	1.48979	2.24601	1.52259	3.01769	2.59
6	282.885	3.29325	7.17842	54.1229	2.73939	1.6344	2.77502	1.3352	3.66493	3.3
7	293.772	3.39164	6.63452	48.8789	2.77443	1.52463	2.96173	1.83874	3.09091	2.565
8	271.337	3.81468	6.99807	45.4895	2.78884	1.78006	2.66959	1.58285	3.19326	2.755
9	283.438	3.58875	7.14743	49.7897	2.72455	1.39448	2.80554	1.52147	4.71446	2.4
10	262.743	2.86673	8.10676	64.6378	3.0897	1.79305	3.09656	1.84302	4.94813	2.615
11	236.323	3.9464	7.992	50.6206	2.94625	1.75676	2.92554	1.56028	4.98055	3.83
12	175.597	5.77144	8.5789	32.7251	3.09506	1.82833	2.68229	1.82748	3.12329	1.825
13	239.063	5.30532	8.84617	40.0269	3.16951	1.7887	3.04621	1.89217	3.16108	3.7
14	340.486	3.17147	6.29381	49.6097	2.32023	1.47913	3.02978	1.79855	3.05859	2.355
15	231.278	3.04914	6.82505	55.3244	2.65082	1.51464	3.33378	1.66134	2.95436	2.915
16	296.633	3.2437	6.93025	53.1951	2.35587	1.21249	2.38853	1.45439	3.04719	2.33
Equal	HR (bpm)	LVDs (mm)	LVDd(mm)	FS (%)	LVAWs (mm)	LVAWd (mm)	LVPWs (mm)	LVPWd (mm)	LA (mm)	PWV (m/s)
1	269.203	3.81095	7.52959	49.387	2.44099	1.42426	2.42428	1.46797	3.69607	2.48
2	262.284	3.68908	6.97247	47.0907	2.60148	1.48518	2.71586	1.53504	2.90876	2.85
3	260.126	3.5708	6.80816	47.5512	2.64932	1.46773	2.94142	1.78316	3.57902	2.405
4	234.668	3.62217	7.40694	51.0976	2.67568	1.31776	2.81334	1.3959	4.59229	2.25
5	278.797	4.11104	7.0915	42.0287	2.38944	1.34817	2.27021	1.30232	3.50691	2.955
6	248.042	2.64507	6.13229	56.8665	2.60588	1.48818	2.43714	1.25234	4.45963	2.075
7	272.504	3.91261	6.92805	43.5252	2.83511	1.65516	2.53834	1.62924	4.77755	2.6
8	252.667	4.59048	7.49987	38.7926	2.67008	1.69238	2.67785	1.72562	3.48752	2.83
9	224.9	2.62967	5.83039	54.8972	2.69639	1.76611	2.77838	1.6137	4.47029	2.915
10	230.282	3.179	7.11828	55.3404	2.66743	1.56676	2.78359	1.69759	3.83005	3.37
11	275.586	3.04609	6.74268	54.8238	2.69811	1.63526	2.63784	1.63913	3.15567	2.835
12	273.598	3.11471	6.60799	52.8644	2.37084	1.33621	2.77236	1.58376	4.80742	3.42
13	300.03	2.49082	6.07918	59.0271	2.83084	1.62126	2.87818	1.5597	4.519	3.03
14	261.963	3.53142	6.91151	48.9052	2.55838	1.46361	2.44411	1.37304	3.8397	3.76
15	263.158	4.88706	8.45828	42.2216	2.87243	2.0752	3.08251	2.01723	4.98341	2.62
Splenda	HR (bpm)	LVDs (mm)	LVDd(mm)	FS (%)	LVAWs (mm)	LVAWd (mm)	LVPWs (mm)	LVPWd (mm)	LA (mm)	PWV (m/s)
1	298.476	3.03928	6.7868	55.2178	2.11871	1.28701	1.98206	1.22329	3.757	2.05
2	317.591	4.52313	8.21146	44.9169	2.11991	1.30534	2.3234	1.28251	3.701	2.975
3	253.85	3.18132	7.16435	55.5952	2.56495	1.23368	2.30747	1.18222	3.778	2.59
4	242.635	4.05626	7.5987	46.6191	2.27792	1.15276	2.65687	1.30934	3.862	3.435
5	288.798	3.76714	6.85042	45.0087	2.02524	1.33865	2.02524	1.33865	3.67405	2.965
6	223.091	3.40326	6.92199	50.8341	1.89036	1.09752	1.89036	1.09752	3.817	3.18
7	248.11	5.88071	8.9704	34.4432	2.7352	1.96479	2.95274	2.02193	5.468	4.54
8	243.492	5.01936	8.86332	43.3693	3.09771	1.95283	3.09564	1.91635	4.6863	2.515
9	257.787	4.10348	7.08872	42.1125	2.83269	1.85737	2.98976	1.95064	4.61048	4.21
10	230.654	4.42282	8.51135	48.0361	3.117	2.0086	3.32468	1.9466	4.71372	2.89
