# Supplementary material for: Long-term consumption of artificial sweeteners does not affect cardiovascular health and survival in rats
Source: PeerJ. 2022 Mar 9;10:e13071. doi: 10.7717/peerj.13071 (PMC8917806; doi:10.7717/peerj.13071)
Supplement: Supplemental Information 3 [file peerj-10-13071-s003.xlsx]

## Sheet: Sheet1
Control	LVEDP (mmHg)	LVSP (mmHg)	+dP/dt (mmHg/s)	-dP/dt (mmHg/s)	Tau Weiss (ms)	SBP (mmHg)	DBP (mmHg)
1	4.246	125.619	7421.11	-5287.2	15.72	123.318	80.249
2	3.945	157.221	9847.28	-7971.48	12.381	158	93.8252
3	2.242	156.203	9989.68	-9111.51	10.738	156.827	111.555
4	1.864	148.81	8139.94	-7600.61	12.08	158.578	100.203
5	0.692	156.079	8320.24	-6521.95	13.338	157.864	99.545
6	0.767	119.011	6893.62	-6171.1	13.687	120.077	82.434
7	0.318	152.979	10084.5	-10313.4	10.874	154.418	99.734
8	0.781	137.387	8956.56	-8656.16	12.484	139.099	92.076
9	2.69	132.223	8118.16	-7219.83	10.857	132.212	82.633
10	1.28	157.348	10952.5	-7133.21	17.938	156.854	105.127
11						170.807	111.135	BP only, cathter was not able to place in LV
12	-0.724	60.574	2510.12	-1742.9	19.646	58.534	24.767
13	4.085	135.243	8478.46	-7205.23	12.888	136.13	93.004
14	6.583	142.76	7736.67	-6475.18	12.814	145.977	92.787
15	6.785	127.692	7377.88	-6625.7	13.193	129.229	84.491
16	1.888	121.811	6065.22	-4927.88	16.89	123.821	81.807
Equal	LVEDP (mmHg)	LVSP (mmHg)	+dP/dt (mmHg/s)	-dP/dt (mmHg/s)	Tau Weiss (ms)	SBP (mmHg)	DBP (mmHg)
1	4.283	132.673	7280.98	-6832.17	12.706	135.59	84.017
2	0.814	164.378	9292.4	-8317.14	11.852	164.005	95
3	3.903	154.647	7874.8	-7856.47	13.415	154.012	97
4	1.818	117.276	6769.49	-5381.83	15.613	120.567	72.126
5	2.67	137.26	8392.12	-7797.59	12.042	138	87.2001
6	0.496	139.075	8364.68	-7153.52	13.366	138.384	84.27
7	4.414	146.541	8205.73	-6598.1	13.168	147.029	99.399
8	1.927	140.895	8380.63	-7681.54	12.247	140.607	86.746
9	6.102	142.953	7113.46	-6651.18	17.388	142.039	91.867
10	2.46	144.978	9122.89	-8642.38	10.698	144.438	94.583
11	3.692	138.088	7141.59	-7152.73	13.174	137.519	81.663
12	1.127	140.405	7734.15	-7608.55	12.823	141.847	89.611
13								No data due to broken catheter
14	6.221	141.908	7410.95	-7178.23	13.113	139.696	89.227
15	4.762	155.415	9705.59	-7655.03	12.455	152.544	104.643
Splenda	LVEDP (mmHg)	LVSP (mmHg)	+dP/dt (mmHg/s)	-dP/dt (mmHg/s)	Tau Weiss (ms)	SBP (mmHg)	DBP (mmHg)
1	5.942	140.276	7741.53	-7116.79	12.815	142.785	88.11
2	3.265	122.393	6734.62	-6977.21	14.371	123.858	80.296
3	3.233	128.668	6875.57	-6193.23	14.337	131.093	81.518
4	7.957	145.004	7317.61	-7816.86	14.015	144.47	85.818
5	3.346	132.111	7876.98	-6463.17	13.722	133.675	86.332
6	4.36	129.023	6741.94	-6525.98	15.514	133.228	80.567
7	12.682	168.652	7779.42	-6007.34	17.394	165.714	115.899
8	6.888	154.331	9917.4	-7594.95	12.733	154.895	101.758
9	6.876	181.824	8218.9	-6645.03	15.456	179.729	121.982
10	6.755	155.802	8837.76	-6832.45	14.818	156.582	102.775
