# Supplementary material for: Long-term consumption of artificial sweeteners does not affect cardiovascular health and survival in rats
Source: PeerJ. 2022 Mar 9;10:e13071. doi: 10.7717/peerj.13071 (PMC8917806; doi:10.7717/peerj.13071)
Supplement: Supplemental Information 4 [file peerj-10-13071-s004.xlsx]

## Sheet: EP data
Control group	AVCT (ms)	AERP (ms)	AF duration (s)
1	62	46	0.5475
2	55	31	0
3	66	29	72.8
4	66	31	0
5	58	26	0
6	59	28	0
7	60	35	0
8	57	39	0
9	64	40	0
10	39	68	2.34
11	70	40	0.175
12	51	55	60
13	46	56	0
14	50	58	0
15	48	64	0
16	52	52	0
Equal	AVCT (ms)	AERP (ms)	AF duration (s)
1	55	49	0
2	73	43	0
3	66	31	3.038
4	66	35	1.668
5	65	44	0.722
6	59	35	0
7	60	47	0.518
8	71	34	3.176
9	66	43	0
10	58	31	0
11	60	34	2.07
12	62	34	0
13	66	33	300
14	60	34	0.684
15	65	34	1.534
Splenda	AVCT (ms)	AERP (ms)	AF duration (s)
1	64	37	0
2	68	50	0.524
3	64	30	2.114
4	64	31	1.746
5	60	39	0
6	74	48	0
7	78	44	0.446
8	68	38	21.592
9	74	36	300
10	72	40	1.08

## Sheet: Figures
	AVCT	ERP
Control	56.4375	43.625
Equal	63.4667	37.4
Splenda	68.6	39.3
SD	8.38227	7.6229
	4.9116	5.99762
	5.73876	6.54981
