# Supplementary material for: Long-term consumption of artificial sweeteners does not affect cardiovascular health and survival in rats
Source: PeerJ. 2022 Mar 9;10:e13071. doi: 10.7717/peerj.13071 (PMC8917806; doi:10.7717/peerj.13071)
Supplement: Supplemental Information 5 [file peerj-10-13071-s005.xlsx]

## Sheet: Data
Control	Glucose (mg/dl)	Triglycerides (mg/dl)	Total Cholesterol (mg/dl)	Non HDL-C (mg/dl)	HDL-C (mg/dl)
1	221.233	164.411	306.066	164.75	141.316
2	301.182	66.302	281.366	118.156	163.21
3	397.336	171.864	292.202	242.238	49.964
4	321.034	146.426	281.416	84.92	196.496
5	346.825	288.096	171.231	99.269	71.962
6	299.961	123.371	97.457	0	132.916
7	373.128	90.819	113.624	0	121.838
8	354.814	383.679	163.549	37.615	125.934
9	418.604	53.538	100.711	29.013	71.698
10	178.53	227.563	309.995	108.355	201.64
11	227.564	45.421	130.34	13.174	117.166
12	239.336	245.94	280.365	134.533	145.832
13	265.865	102.287	225.36	67.716	157.644
14	419.75	40.831	91.552	24.788	66.764
15	292.982	73.866	104.665	17.111	87.554
16	302.192	55.039	81.466	8.612	72.854
Equal	Glucose (mg/dl)	Triglycerides (mg/dl)	Total Cholesterol (mg/dl)	Non HDL-C (mg/dl)	HDL-C (mg/dl)
1	344.518	296.627	108.393	0	113.228
2	260.153	107.285	157.192	84.496	72.696
3	290.571	92.372	100.986	15.794	85.192
4	294.852	61.213	75.711	8.265	67.446
5	204.215	47.377	79.489	14.773	64.716
6	174.053	53.83	84.144	12.236	71.908
7	393.205	322.741	257.117	112.335	144.782
8	278.783	55.514	97.257	31.701	65.556
9	354.15	251.667	194.279	128.461	65.818
10	267.508	39.427	86.722	0	111.128
11	283.019	63.658	81.491	26.751	54.74
12	242.683	63.329	74.56	0	91.65
13	342.468	119.023	95.455	48.799	46.656
14	399.687	79.956	69.755	0	91.912
15	498.207	192.247	251.987	184.331	67.656
Splenda	Glucose (mg/dl)	Triglycerides (mg/dl)	Total Cholesterol (mg/dl)	Non HDL-C (mg/dl)	HDL-C (mg/dl)
1	308.81	109.375	83.619	16.593	67.026
2	272.799	77.805	68.579	13.261	55.318
3	307.739	100.391	54.84	29.71	25.13
4	234.061	66.282	84.995	16.919	68.076
5	241.04	55.723	70.806	14.542	56.264
6	214.737	92.823	76.662	22.552	54.11
7	181.816	130.297	246.557	105.241	141.316
8	186.806	235.871	301.937	87.433	214.504
9	230.714	400	339.424	98.618	240.806
10	122.97	254.945	306.967
